# Supplementary material
Source: PubMed Central journal article supplement (PMC4969573)
Supplement: EMBJ-35-1628-s001.pdf [file EMBJ-35-1628-s001.pdf]

## **APPENDIX**

### **Table of Contents**

|                                   |   |
|-----------------------------------|---|
| Appendix Figure S1                | 1 |
| Appendix Figure S2                | 2 |
| Appendix Figure Legends           | 3 |
| Appendix Table S1                 | 4 |
| Appendix Supplementary Methods    | 5 |
| Appendix Supplementary References | 7 |

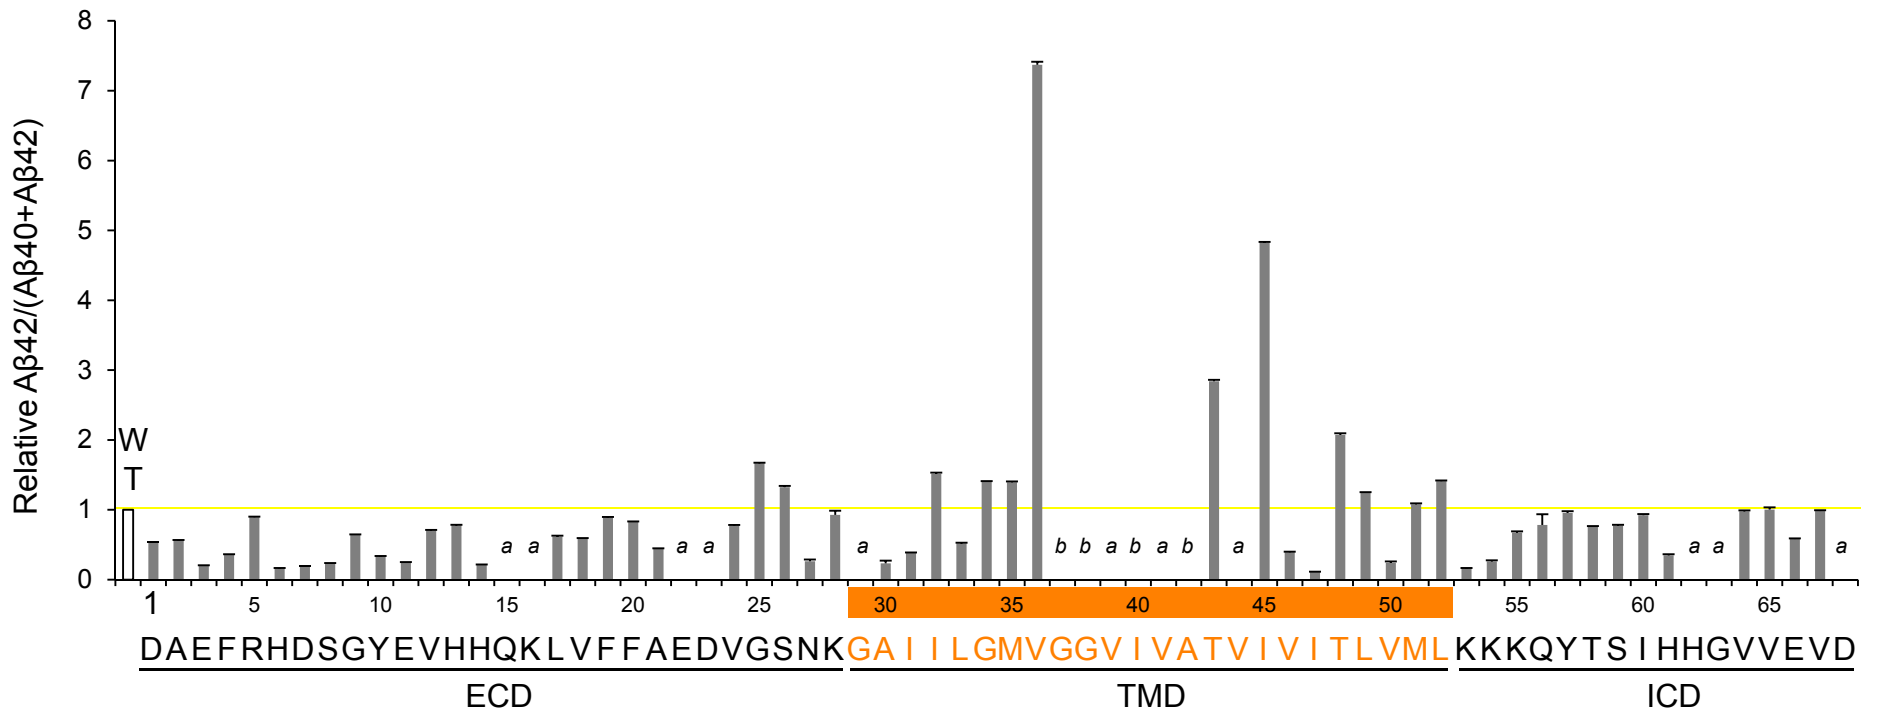

Fukumori and Steiner, Appendix Figure S1

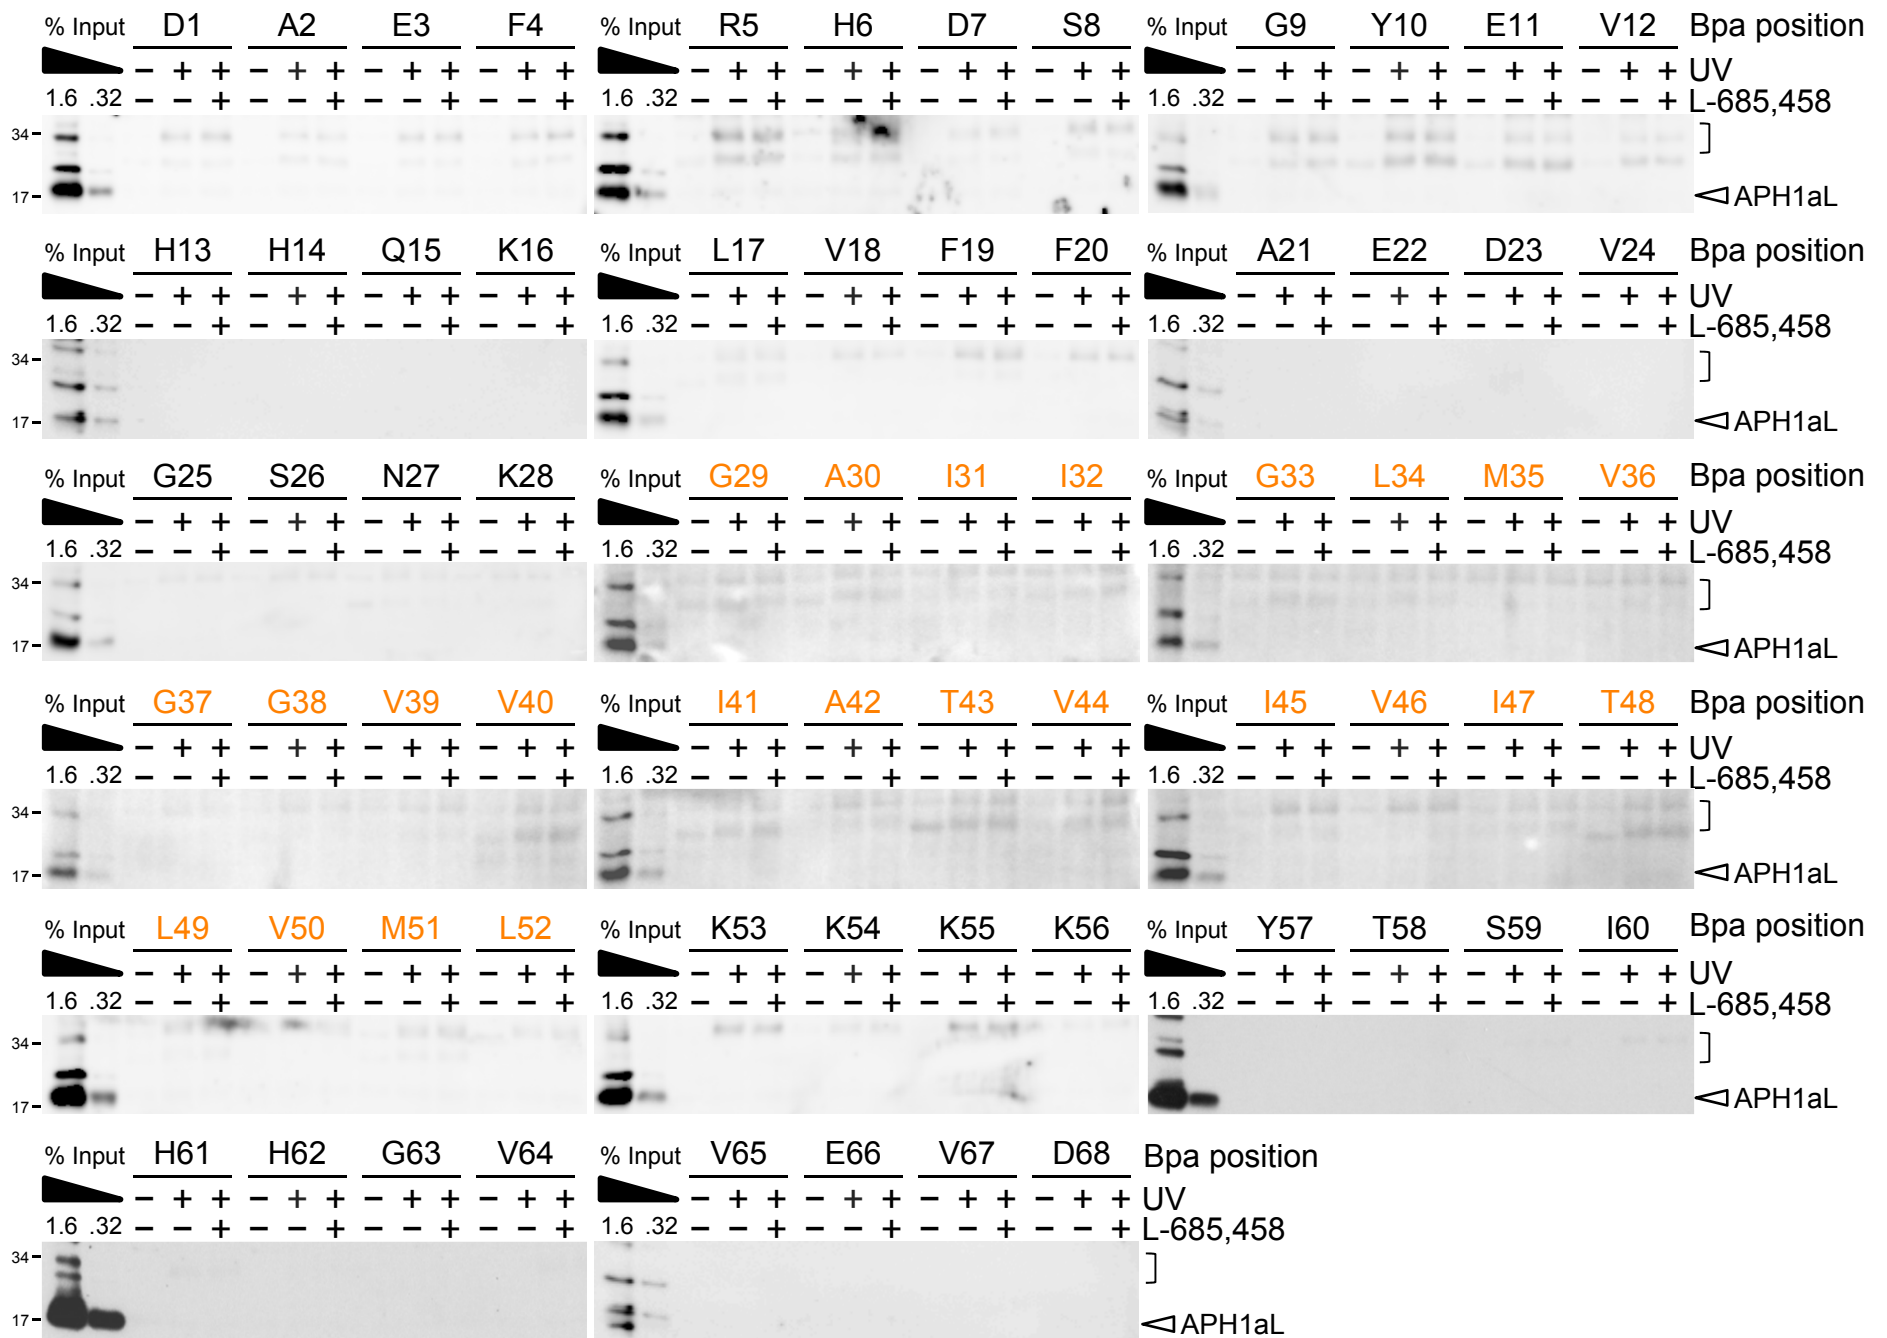

Fukumori and Steiner, Appendix Figure S2

## Appendix Figure Legends

### Appendix Figure S1 – A $\beta$ 42/(A $\beta$ 40+A $\beta$ 42) ratios of C99-Bpa substrates.

The large majority of the C99-Bpa constructs do not cause pathogenic APP processing. A $\beta$ 42/(A $\beta$ 40+A $\beta$ 42) ratios are expressed relative to that for WT C99 (typically 10-20% in each set of experiments), which was set to 1 (yellow line). Bars denote the mean  $\pm$  S.E. (n = 3).

*a*, While only small amounts of A $\beta$ 40 were detected (with the exception of C99-V44Bpa, which showed robust amounts of A $\beta$ 40), A $\beta$ 42 levels were generally below the limit of detection.

*b*, A $\beta$ 40 and A $\beta$ 42 levels could both not be detected, most likely because the location of these Bpa mutations in the epitope region of the detection antibodies might have disrupted A $\beta$  recognition.

### Appendix Figure S2 - APH-1 is unlikely to provide functionally relevant C99 interaction sites.

Crosslinking to APH-1 was overall very inefficient over the whole range of C99. Unlike observed for all other subunits, potential C99-APH-1 crosslink bands were insensitive to L-685,458 suggesting that APH-1 does not play a functional role in substrate recruitment. Bracket indicates the molecular weight range of putative APH-1aL-C99 crosslink bands. TMD residues are highlighted in orange.

## Appendix Table S1

Effect of GSIs of various structural classes on C99 crosslinking to exosites versus the active site of  $\gamma$ -secretase

|              |                | GSI      |           |            |        |
|--------------|----------------|----------|-----------|------------|--------|
| Bpa position | Binding target | III-31-C | LY-411575 | Begacestat | ELN594 |
| E3           | PS1 NTF        | ↑        | ↑         | ↑          | ↑      |
| H6           | NCT            | ↑        | ↑         | ↑          | ↑      |
| A30          | PEN-2          | ↑        | ↑         | ↑          | ↑      |
| L49          | PS1 NTF        | ↓        | ↓         | ↓          | ↓      |

## Appendix Supplementary Methods

### Expression and purification of Bpa-containing APP C99 substrates

C99-Bpa constructs in pQE60 (Qiagen) containing the desired amber codon mutations were co-transformed with pDule-*pBpa* (Farrell et al, 2005) co-expressing a Bpa-specific aminoacyl-tRNA synthetase and the corresponding amber suppressor tRNA (kind gift from Peter G. Schultz, The Scripps Research Institute) into *E. coli* Rosetta (Novagen). For the expression of the C99-K16Bpa construct pSup-BpaRS-6TRN was used (Ryu & Schultz, 2006). Transformants were selected, cultured and maintained in LB media containing 100 µg/ml ampicillin and 5 µg/ml tetracycline. To express the substrate proteins, 100 ml overnight pre-cultures were inoculated into 1 liter LB media containing antibiotics and cultured at 37°C for 1 hr. Following addition of 5 ml of 2 M Tris pH 8.5, 10 ml of 50 mM Bpa (Bachem) in 1 M HCl, and 0.6 ml of 1 M IPTG (Sigma), culturing was continued for 6-7 hr. Cells were harvested by centrifugation at 7000 x *g* for 10 min at 4°C and stored at -20°C until further use. For protein purification, the frozen cell pellets were thawed, resuspended in 50 ml of 20 mM Tris pH 7.5, 1 mM EDTA, and subjected to sonication. The resulting sonicates were centrifuged at 50,000 x *g* for 15 min at 4°C and the pellets solubilized in lysis buffer (20 mM Tris pH 8.5, 6 M urea, 1% Triton-X 100, 1% SDS, 1 mM CaCl<sub>2</sub>, 100 mM NaCl) with protease inhibitor (PI) mix (Sigma) O/N at 4°C with rotation. After a clarifying centrifugation at 50,000 x *g* for 15 min 4°C, lysates were diluted with 3 volumes of 20 mM Tris pH 7.5, 150 mM NaCl and then rotated with 1 ml of a 50% slurry of Ni-NTA agarose beads (Qiagen) for 1-2 hr at RT in batch mode. Beads were loaded on a column, washed once with 1 ml of 20 mM Tris pH 8.5, 300 mM NaCl, 1% Triton-X 100 buffer and then once with 5 ml of 20 mM Tris pH 8.5, 300 mM NaCl, 0.2% SDS, followed by elution of bound substrate proteins with 20 mM Tris pH 8.5, 300 mM NaCl, 0.2% SDS, 100 mM imidazole. Eluates containing purified substrate proteins were stored at -20°C in aliquots until further use in  $\gamma$ -secretase in vitro cleavage assays or photocrosslinking experiments. Purification of all other APP substrate constructs with Bpa substitutions was performed as described above. Expression and purification of unmodified APP C100-His<sub>6</sub> and Notch1 N102-FmH substrates was carried out likewise but with omission of the respective selection antibiotic and Bpa. To purify N102-FmH, frozen cell pellets were resuspended in 100 mM Tris pH 8.5 with 1x PI mix (Sigma). Following sonication and addition of NaCl to a final concentration of 0.5 M, sonicates were centrifuged at 18,000 x *g* for 15 min at 4°C. The resultant supernatant was further centrifuged at 100,000 x *g* for 1 hr at 4°C and the pellet fraction solubilized in lysis buffer and subjected to purification as above.

### **$\gamma$ -Secretase in vitro cleavage assays**

Membrane fractions of HEK293 cells were prepared as described previously (Winkler et al, 2009). For subsequent use in  $\gamma$ -secretase in vitro assays, membranes were lysed in 150 mM Na-Citrate pH 6.4, 1% CHAPSO, 1x Complete PI mix (Roche) by incubation on ice for 1 hr. After centrifugation at 100.000 x g for 90 min at 4°C, the CHAPSO lysates were diluted to a final assay buffer concentration of 150 mM Na-Citrate pH 6.4, 10 mM DTT, 0.1 mg/ml BSA, 0.5 mg/ml phosphatidylcholine (Sigma, P3556), 0.25% CHAPSO, 1x Complete PI mix, with or without 1  $\mu$ M L-685,458 in DMSO, mixed with 2  $\mu$ M substrate and incubated with shaking O/N at 37°C. Samples were mixed with SDS-PAGE sample buffer, electrophoresed on 10-20% Tris-Tricine gels (Life Science), blotted on nitrocellulose membranes and analyzed for AICD generation by immunostaining using penta-His antibody. To measure A $\beta$ 40 and A $\beta$ 42 species, aliquots of the assays were diluted 50-fold with blocking buffer (PBS supplemented with 1% BSA and 0.05% Tween 20) and analyzed by A $\beta$  sandwich immunoassay (Meso Scale Discovery (MSD)) as described previously (Shirotani et al, 2007). For some substrates (C99-Bpa E3, F4, H6, D7, S8 and Y10), the detection of A $\beta$ 40 and A $\beta$ 42 species was not possible in the conventional immunoassay presumably due to disruption of the A $\beta$ 1-16 epitope of the 2D8 capture antibody by Bpa. For these substrates, the MSD V-PLEX Plus A $\beta$  Peptide Panel 1 (4G8) kit was used.

## Appendix Supplementary References

Farrell IS, Toroney R, Hazen JL, Mehl RA, Chin JW (2005) Photo-cross-linking interacting proteins with a genetically encoded benzophenone. *Nat Methods* 2: 377-384

Ryu Y, Schultz PG (2006) Efficient incorporation of unnatural amino acids into proteins in *Escherichia coli*. *Nat Methods* 3: 263-265

Shirotani K, Tomioka M, Kremmer E, Haass C, Steiner H (2007) Pathological activity of familial Alzheimer's disease-associated mutant presenilin can be executed by six different  $\gamma$ -secretase complexes. *Neurobiol Dis* 27: 102-107

Winkler E, Hobson S, Fukumori A, Dumpelfeld B, Luebbbers T, Baumann K, Haass C, Hopf C, Steiner H (2009) Purification, pharmacological modulation, and biochemical characterization of interactors of endogenous human  $\gamma$ -secretase. *Biochemistry* 48: 1183-1197
